# Supplementary material for: Discovery of Potential Inhibitors of Squalene Synthase from Traditional Chinese Medicine Based on Virtual Screening and In Vitro Evaluation of Lipid-Lowering Effect
Source: MDPI journal article supplement (doi:10.3390/molecules23051040), 2018-04-28

## Article

# Synthase from Traditional Chinese Medicine Based on Virtual Screening and In Vitro Evaluation of Lipid-Lowering Effect

Yankun Chen <sup>1</sup>, Xi Chen <sup>1</sup>, Ganggang Luo <sup>1</sup>, Xu Zhang <sup>1</sup>, Fang Lu <sup>1</sup>, Liansheng Qiao <sup>1</sup>, Wenjing He <sup>2</sup>, Gongyu Li <sup>1</sup> and Yanling Zhang <sup>1,\*</sup>

<sup>1</sup> School of Chinese Material Medica, Beijing University of Chinese Medicine, Beijing 100102, China; 18811791975@163.com (Y.C.); chenxi\_cx95@163.com (X.C.); 17801080765@163.com (G.L.); 18003381008@163.com (X.Z.); lufang1017@163.com (F.L.); b20100222012@163.com (L.Q.); lidoc2727@163.com (G.L.)

<sup>2</sup> College of Traditional Chinese Medicine Xinjiang Medical University, Urumqi 830054, China; wenjhe@163.com

\* Correspondence: zhangyanling@bucm.edu.cn; Tel.: +86-10-8473-8620

Received: 19 March 2018; Accepted: 25 April 2018; Published: 28 April 2018

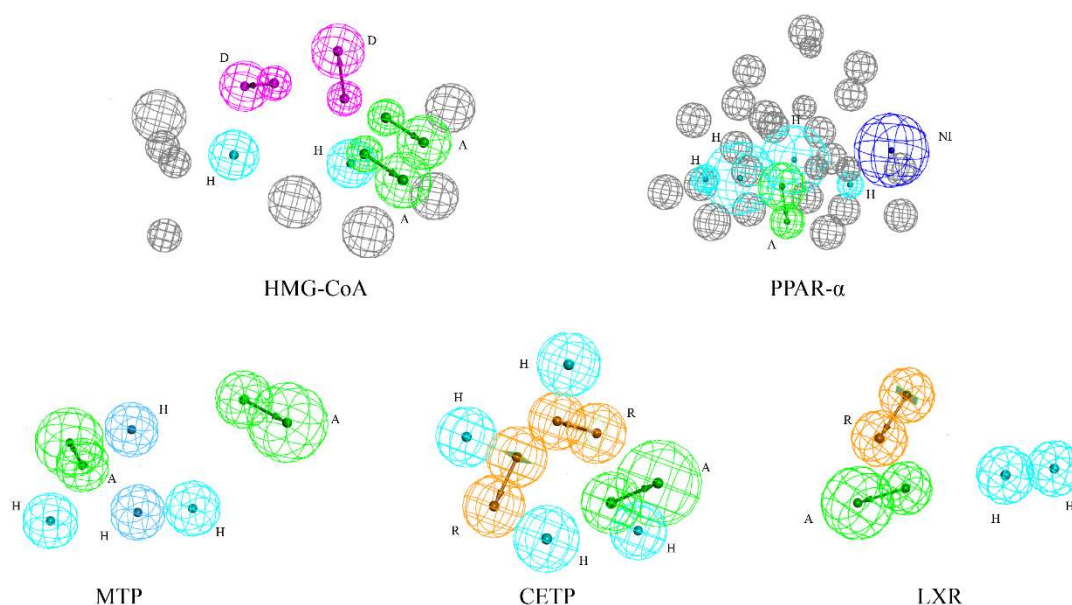

**Figure S1.** Anti-hyperlipidemia database, including 3-hydroxy-3-methylglutaryl coenzyme A (HMG-CoA), Peroxisome proliferator-activated receptor- $\alpha$  (PPAR- $\alpha$ ), Liver X receptor  $\beta$  (LXR $\beta$ ), Cholesteryl ester transfer protein (CETP), Microsomal triglyceride transfer protein (MTP), Wherein, green features represented hydrogen bond acceptor(A); pink features stood for hydrogen bond donor(D); dark blue features indicated negative ionizable group(NI); light blue features represented hydrophobic group(H); and orange features represented ring aromatic group(R).

© 2018 by the authors. Licensee MDPI, Basel, Switzerland. This article is an open access article distributed under the terms and conditions of the Creative Commons Attribution (CC BY) license (<http://creativecommons.org/licenses/by/4.0/>).

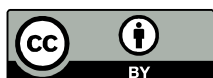

Supplement: s1 [file s1]
